# Supplementary material for: Metal–CO Bonding in Mononuclear Transition Metal Carbonyl Complexes
Source: PubMed Central journal article supplement — JACS Au. 2021 Apr 19;1(5):623–45. doi: 10.1021/jacsau.1c00106 (PMC8395605; doi:10.1021/jacsau.1c00106), 2021-04-19
Supplement: au1c00106_si_001.pdf [file au1c00106_si_001.pdf]

# Supporting Information

## Metal-CO Bonding in Mononuclear Transition Metal Carbonyl Complexes

Gernot Frenking\*<sup>[a,b]</sup>, Israel Fernández,<sup>[c]</sup> Nicole Holzmann\*<sup>[b]</sup>, Sudip Pan<sup>[a,b]</sup>, Ingo Krossing<sup>[d]</sup>  
and Mingfei Zhou<sup>[e]</sup>

- 
- <sup>[a]</sup> Institute of Advanced Synthesis, School of Chemistry and Molecular Engineering, Jiangsu National Synergetic Innovation Center for Advanced Materials, Nanjing Tech University, Nanjing 211816, China.
- <sup>[b]</sup> Fachbereich Chemie, Philipps-Universität Marburg, Hans-Meerwein-Strasse 4, 35032 Marburg (Germany)
- <sup>[c]</sup> Departamento de Química Orgánica I and Centro de Innovación en Química Avanzada (ORFEO-CINQA), Facultad de Ciencias Químicas, Universidad Complutense de Madrid, 28040 Madrid (Spain)
- <sup>[d]</sup> Institut für Anorganische und Analytische Chemie, Albert-Ludwigs-Universität Freiburg, Albertstrasse 21, 79104 Freiburg, Germany.
- <sup>[e]</sup> Department of Chemistry, Collaborative Innovation Center of Chemistry for Energy Materials, Shanghai Key Laboratory of Molecular Catalysis and Innovative Materials, Fudan University, Shanghai 200433, China

\*frenking@chemie.uni-marburg.de

\*israel@quim.ucm.es

\*nicole.holzmann@googlemail.com
